# Supplementary material
Source: MDPI journal article supplement (https://www.mdpi.com/2624-6511/5/4/82)
Supplement: s1 [file s1]

## Personal Information

|                  |                  |                  |                  |                                      |                   |
|------------------|------------------|------------------|------------------|--------------------------------------|-------------------|
| Name and Surname |                  |                  |                  |                                      |                   |
| Gender           |                  |                  |                  |                                      |                   |
| Neighborhood     | Caferaga         | Feneryolu        | Sahrayicedid     | Others....                           |                   |
| Age              | 18-24            | 25-44            | 45-64            |                                      | 65 +              |
| Education Level  | Primary School   | High School      | University       | Higher Education like Master and PhD |                   |
| Occupation:      |                  |                  |                  |                                      |                   |
| Income           | 2000 TL and less | 2001 TL- 4000 TL | 4001 TL- 6000 TL | 6000 TL and more                     | No regular income |
| Household size   | 1                | 2                | 3 ve 4           |                                      | 5+                |

| Question Items and Question Number of Survey |                                                                                                                | Reverse Scoring | Response Format and Scale |   |   |   |   |   |   |        |
|----------------------------------------------|----------------------------------------------------------------------------------------------------------------|-----------------|---------------------------|---|---|---|---|---|---|--------|
| 1                                            | If I reduce my energy consumption, I will contribute to the protection of the natural resources.               | Unlikely        | 1                         | 2 | 3 | 4 | 5 | 6 | 7 | Likely |
| 2                                            | If I reduce my energy consumption, I will saving money.                                                        | Unlikely        | 1                         | 2 | 3 | 4 | 5 | 6 | 7 | Likely |
| 3                                            | If I reduce my energy consumption, I have got to change my lifestyle.                                          | Unlikely        | 1                         | 2 | 3 | 4 | 5 | 6 | 7 | Likely |
| 4                                            | It causes a lot of worry and concern about the future of natural resources, If I reduce my energy consumption. | Unlikely        | 1                         | 2 | 3 | 4 | 5 | 6 | 7 | Likely |
| 5                                            | Energy calculation platforms are complicated for me                                                            | Unlikely        | 1                         | 2 | 3 | 4 | 5 | 6 | 7 | Likely |

| Question Items and<br>Question Number of Survey | Reverse<br>Scoring | Response Format and Scale |  |  |  |  |  |  |
|-------------------------------------------------|--------------------|---------------------------|--|--|--|--|--|--|
|-------------------------------------------------|--------------------|---------------------------|--|--|--|--|--|--|

|    |                                                                                          |                                                                                   |                       |    |    |    |   |   |   |   |                     |
|----|------------------------------------------------------------------------------------------|-----------------------------------------------------------------------------------|-----------------------|----|----|----|---|---|---|---|---------------------|
| 6  | Using alternative energy resources are very important for reducing energy consumption.   |  | Unlikely              | 1  | 2  | 3  | 4 | 5 | 6 | 7 | Likely              |
| 7  | When I am reducing my energy consumption I feel that i am forced to change my habits.    |                                                                                   | Unlikely              | 1  | 2  | 3  | 4 | 5 | 6 | 7 | Likely              |
| 8  | Energy efficient appliances do not have reasonable prices.                               |                                                                                   | Unlikely              | 1  | 2  | 3  | 4 | 5 | 6 | 7 | Likely              |
| 9  | Contributing the protection of the natural resources is..                                |                                                                                   | Extremely undesirable | -3 | -2 | -1 | 0 | 1 | 2 | 3 | Extremely desirable |
| 10 | Saving money is..                                                                        |                                                                                   | Extremely undesirable | -3 | -2 | -1 | 0 | 1 | 2 | 3 | Extremely desirable |
| 11 | Changing my lifestyle is..                                                               |                                                                                   | Extremely undesirable | -3 | -2 | -1 | 0 | 1 | 2 | 3 | Extremely desirable |
| 12 | Causing a lot of worry and concern about the future of natural resources is..            |                                                                                   | Extremely undesirable | -3 | -2 | -1 | 0 | 1 | 2 | 3 | Extremely desirable |
| 13 | My family think I should/should not reduce my energy consumption                         |                                                                                   | Should not            | -3 | -2 | -1 | 0 | 1 | 2 | 3 | Should              |
| 14 | The government/ Municipality would approve/dissapprove of my reducing energy consumption |                                                                                   | Disapprove            | -3 | -2 | -1 | 0 | 1 | 2 | 3 | Approve             |
| 15 | My friends would approve/dissapprove of my reducing energy consumption                   |                                                                                   | Disapprove            | -3 | -  | -1 | 0 | 1 | 2 | 3 | Approve             |

| Question Items and<br>Question Number of Survey | Reverse<br>Scoring | Response Format and Scale |  |  |  |  |  |  |
|-------------------------------------------------|--------------------|---------------------------|--|--|--|--|--|--|
|-------------------------------------------------|--------------------|---------------------------|--|--|--|--|--|--|

|    |                                                                        |                       |    |    |    |   |   |   |   |                       |
|----|------------------------------------------------------------------------|-----------------------|----|----|----|---|---|---|---|-----------------------|
| 16 | My neighbors do/ do not reduce their energy consumption                | Do not                | -3 | -2 | -1 | 0 | 1 | 2 | 3 | Do                    |
| 17 | I feel under pressure of social media to reduce my energy consumption  | Strongly disagree     | 1  | 2  | 3  | 4 | 5 | 6 | 7 | Strongly agree        |
| 18 | I want to reduce my energy consumption within the next 8 months.       | Strongly disagree     | 1  | 2  | 3  | 4 | 5 | 6 | 7 | Strongly agree        |
| 19 | People who are important to me want me to reduce my energy consumption | Strongly disagree     | 1  | 2  | 3  | 4 | 5 | 6 | 7 | Strongly agree        |
| 20 | Reducing my energy consumption within the next 8 months would be:      | Harmful               | 1  | 2  | 3  | 4 | 5 | 6 | 7 | Beneficial            |
| 21 | Reducing my energy consumption within the next 8 months would be:      | Pleasant              | 1  | 2  | 3  | 4 | 5 | 6 | 7 | Unpleasant            |
| 22 | Reducing my energy consumption within the next 8 months would be:      | The wrong thing to do | 1  | 2  | 3  | 4 | 5 | 6 | 7 | The right thing to do |
| 23 | Reducing my energy consumption within the next 8 months would be:      | Good practice         | 1  | 2  | 3  | 4 | 5 | 6 | 7 | Bad practice          |
| 24 | Doing my family's think I should do is important to me                 | Not at all            | 1  | 2  | 3  | 4 | 5 | 6 | 7 | Very much (extremely) |

| Question Items and<br>Question Number of Survey | Reverse<br>Scoring | Response Format and Scale |  |  |  |  |  |  |  |
|-------------------------------------------------|--------------------|---------------------------|--|--|--|--|--|--|--|
|-------------------------------------------------|--------------------|---------------------------|--|--|--|--|--|--|--|

|    |                                                                                                                           |                   |    |    |    |   |   |   |   |                       |
|----|---------------------------------------------------------------------------------------------------------------------------|-------------------|----|----|----|---|---|---|---|-----------------------|
| 25 | The government/Municipality's approval of reducing my energy consumption is important to me                               | Not at all        | 1  | 2  | 3  | 4 | 5 | 6 | 7 | Very much (extremely) |
| 26 | The approval of my friends is important to me                                                                             | Not at all        | 1  | 2  | 3  | 4 | 5 | 6 | 7 | Very much (extremely) |
| 27 | Doing what other neighbors do is important to me                                                                          | Not at all        | 1  | 2  | 3  | 4 | 5 | 6 | 7 | Very much (extremely) |
| 28 | I am less likely/ more likely to reduce my energy consumption if energy calculator of the platform is complicated for me  | Less likely       | -3 | -2 | -1 | 0 | 1 | 2 | 3 | More likely           |
| 29 | I am less likely/ more likely to reduce my energy consumption if I try energy saving suggestions                          | Less likely       | -3 | -2 | -1 | 0 | 1 | 2 | 3 | More likely           |
| 30 | I am less likely/ more likely to reduce my energy consumption if I feel that I am forced to change my habit               | Less likely       | -3 | -2 | -1 | 0 | 1 | 2 | 3 | More likely           |
| 31 | I am less likely/ more likely to reduce my energy consumption if energy efficient appliances do not have reasonable price | Less likely       | -3 | -2 | -1 | 0 | 1 | 2 | 3 | More likely           |
| 32 | Most people who are important to me think that I should or should not reduce my energy consumption                        | Should            | 1  | 2  | 3  | 4 | 5 | 6 | 7 | Should not            |
| 33 | I expect to reduce my energy consumption within the next 8 months.                                                        | Strongly disagree | 1  | 2  | 3  | 4 | 5 | 6 | 7 | Strongly agree        |

| Question Items and<br>Question Number of Survey | Reverse<br>Scoring | Response Format and Scale |  |  |  |  |  |  |
|-------------------------------------------------|--------------------|---------------------------|--|--|--|--|--|--|
|-------------------------------------------------|--------------------|---------------------------|--|--|--|--|--|--|

|    |                                                                                           |                                                                                   |                   |   |   |   |   |   |   |   |                       |
|----|-------------------------------------------------------------------------------------------|-----------------------------------------------------------------------------------|-------------------|---|---|---|---|---|---|---|-----------------------|
| 34 | I feel under social pressure to reduce my energy consumption                              |  | Strongly disagree | 1 | 2 | 3 | 4 | 5 | 6 | 7 | Strongly agree        |
| 35 | Whether I reduce my energy consumption or not is entirely up to me                        |                                                                                   | Strongly disagree | 1 | 2 | 3 | 4 | 5 | 6 | 7 | Strongly agree        |
| 36 | For me to reduce my energy consumption is                                                 |                                                                                   | Easy              | 1 | 2 | 3 | 4 | 5 | 6 | 7 | Difficult             |
| 37 | The decision to reduce my energy consumption is beyond my control                         |                                                                                   | Strongly disagree | 1 | 2 | 3 | 4 | 5 | 6 | 7 | Strongly agree        |
| 38 | It is expected of me that I reduce my energy consumption                                  |                                                                                   | Strongly disagree | 1 | 2 | 3 | 4 | 5 | 6 | 7 | Strongly agree        |
| 39 | I am confident that I could reduce my energy consumption if I wanted to                   |                                                                                   | Strongly disagree | 1 | 2 | 3 | 4 | 5 | 6 | 7 | Strongly agree        |
| 40 | I intend to reduce my energy consumption within the next 8 months.                        |                                                                                   | Strongly disagree | 1 | 2 | 3 | 4 | 5 | 6 | 7 | Strongly agree        |
| 41 | Government support and approval is very important for me to reduce my energy consumption. |                                                                                   | Not at all        | 1 | 2 | 3 | 4 | 5 | 6 | 7 | Very much (extremely) |
| 42 | If I have act with my neighbors, I can reduce my energy consumption.                      |                                                                                   | Strongly disagree | 1 | 2 | 3 | 4 | 5 | 6 | 7 | Strongly agree        |

| Question Items and<br>Question Number of Survey |                                                                                | Reverse<br>Scoring | Response Format and Scale |   |   |   |   |   |   |                |
|-------------------------------------------------|--------------------------------------------------------------------------------|--------------------|---------------------------|---|---|---|---|---|---|----------------|
| 43                                              | I am curious about energy consumption of other neighborhoods in Kadıkoy.       | Strongly disagree  | 1                         | 2 | 3 | 4 | 5 | 6 | 7 | Strongly agree |
| 44                                              | Energy consumption level of other neighborhoods affects my energy consumption. | Strongly disagree  | 1                         | 2 | 3 | 4 | 5 | 6 | 7 | Strongly agree |
| 45                                              | My social media network affects me to reduce my energy consumption.            | Strongly disagree  | 1                         | 2 | 3 | 4 | 5 | 6 | 7 | Strongly agree |

## References

1. Ajzen, I. (2002). Perceived behavioral control, self-efficacy, locus of control, and the theory of planned behavior 1. *Journal of applied social psychology*, 32(4), 665-683.
2. Francis, J., Eccles, M. P., Johnston, M., Walker, A. E., Grimshaw, J. M., Foy, R., ... & Bonetti, D. (2004). Constructing questionnaires based on the theory of planned behaviour: A manual for health services researchers.
3. Ajzen, I. (2006). Constructing a theory of planned behavior questionnaire.
